# Supplementary material for: Direct photoresponsive inhibition of a p53-like transcription activation domain in PIF3 by Arabidopsis phytochrome B
Source: PubMed Central journal article supplement (PMC8460787; doi:10.1038/s41467-021-25909-5), 2021-09-23
Supplement: 41467_2021_25909_MOESM1_ESM.pdf [file 41467_2021_25909_MOESM1_ESM.pdf]

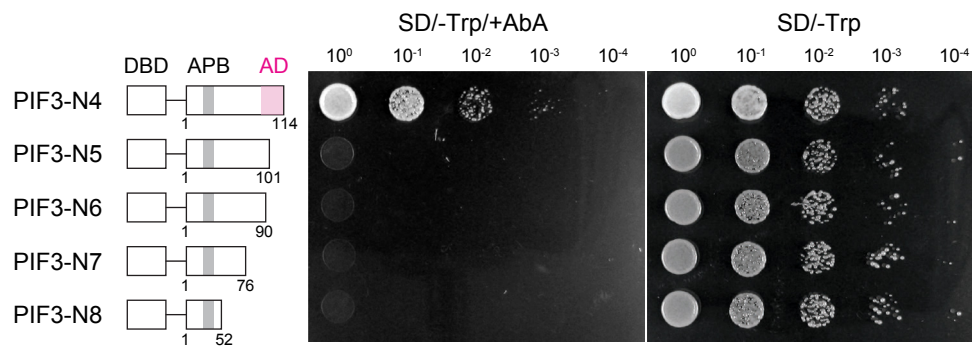

**Supplementary Fig. 1. The aa<sub>1-90</sub> region does not exhibit transactivation activity in yeast.** A series of N-terminal fragments of PIF3 between amino acids 1 and 101 were fused with Gal4-DBD as shown in the schematics and examined for their self-activation activity in yeast. Serial dilutions of the yeast strains containing the respective constructs were grown on either SD/-Trp/+AbA or SD/-Trp (control) media.

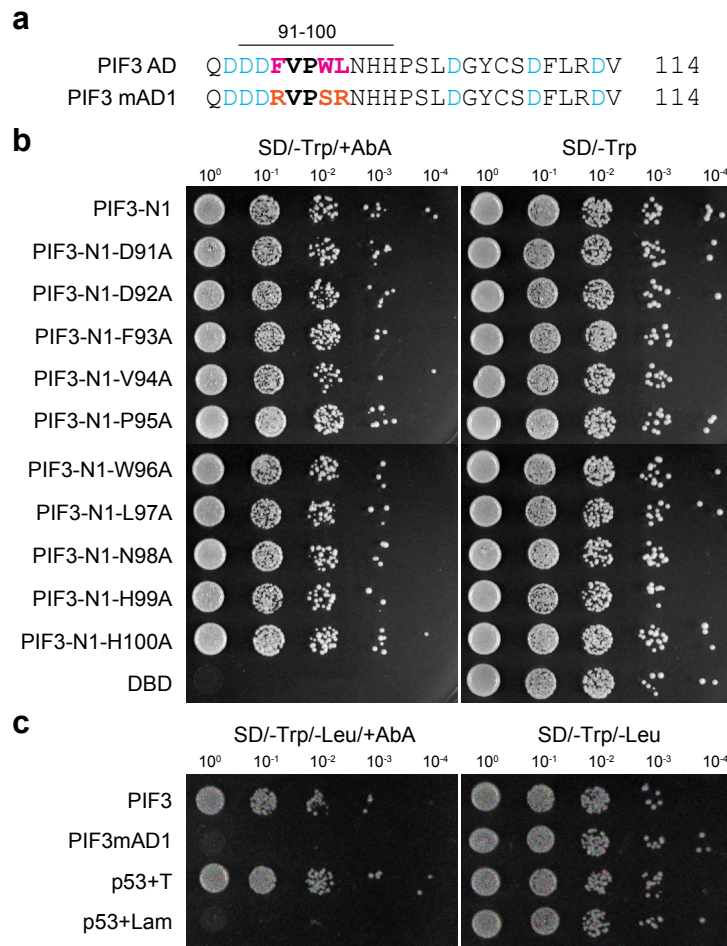

**Supplementary Fig. 2. Abolishing the transactivation activity of PIF3 requires multiple mutations in the AD.** **a** Sequence alignment of the PIF3 AD and the mAD1 mutant, in which the three hydrophobic residues in the  $\Phi$ xx $\Phi$  activator motif were replaced with either an arginine or a serine (labeled in orange). The black bar indicates the region of amino acids 91 to 100, containing the conserved activator motif. **b** Yeast transactivation assays of DBD-PIF3-N1 (PIF3-N1) and DBD-PIF3-N1 mutants with individual amino acids between 91 and 100 replaced with an alanine. The yeast strains containing the respective constructs were grown on either SD/-Trp/+AbA or SD/-Trp (control) media. **c** Yeast transactivation assays of DBD-PIF3 (PIF3) and DBD-PIF3mAD1 (PIF3mAD1). Serial dilutions of the yeast strains containing the respective constructs were grown on either SD/-Trp/-Leu/+AbA or SD/-Trp/-Leu (control) media. Yeast strains containing p53 and either the SV40 large T-antigen (p53+T) or lamin (p53+Lam) were used as positive and negative controls, respectively.

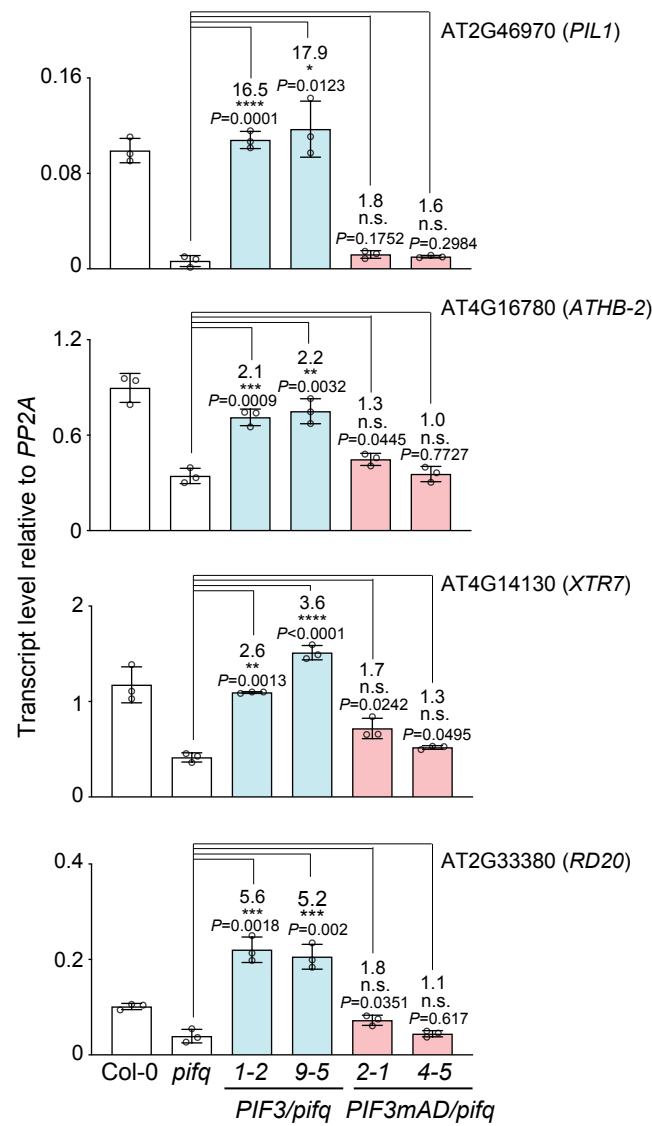

**Supplementary Fig. 3. *PIF3mAD/pifq* lines exhibit reduced activity in PIF target gene expression in R light.** qRT-PCR results showing the steady-state transcript levels of select PIF3 target genes in 4-d-old R-light-grown seedlings of Col-0, *pifq*, and the *PIF3/pifq* and *PIF3mAD/pifq* lines. The transcript levels were calculated relative to those of *PP2A*. Error bars represent the s.d. of three biological replicates. Numbers indicate fold changes relative to *pifq*; the statistical significance was analyzed using two-tailed Student's t-test (\*\*  $P \leq 0.01$ , \*\*\*  $P \leq 0.001$ , \*\*\*\*  $P \leq 0.0001$ ); n.s. indicates the difference is either less than 2-fold or not statistically significant.

**Supplementary Table 1. PCR primers used for making the constructs of PIF3 and PIF3 paralogs.**

|                          | <b>Insert</b>  | <b>Vector</b>      | <b>Forward primer</b>                         | <b>Reverse primer</b>                      |
|--------------------------|----------------|--------------------|-----------------------------------------------|--------------------------------------------|
| pBridge-PIF3             | <i>PIF3</i>    | pBridge            | acagttgactgtatcgccggctatgcctctgtttgagctttcagg | ggaattagctggctgcaggtcacgacgatccacaaaactg   |
| pBridge-PIF3-N1          | <i>PIF3-N1</i> | pBridge            | acagttgactgtatcgccggctatgcctctgtttgagctttcagg | ggaattagctggctgcaggtcaacctgcttcttccatc     |
| pBridge-PIF3-N2          | <i>PIF3-N2</i> | pBridge            | acagttgactgtatcgccggctatgcctctgtttgagctttcagg | ggaattagctggctgcaggttacgggctttgaggactctttc |
| pBridge-PIF3-N3          | <i>PIF3-N3</i> | pBridge            | acagttgactgtatcgccggctatgcctctgtttgagctttcagg | ggaattagctggctgcaggttacggattggtttggtgtagg  |
| pBridge-PIF3-N4          | <i>PIF3-N4</i> | pBridge            | acagttgactgtatcgccggctatgcctctgtttgagctttcagg | ggaattagctggctgcaggttagggatgatgattcaacctg  |
| pBridge-PIF3-N5          | <i>PIF3-N5</i> | pBridge            | acagttgactgtatcgccggctatgcctctgtttgagctttcagg | ggaattagctggctgcaggtcagggatgatgattcaacct   |
| pBridge-PIF3-N6          | <i>PIF3-N6</i> | pBridge            | acagttgactgtatcgccggctatgcctctgtttgagctttcagg | ggaattagctggctgcaggtcagcttgactcaaacccgtc   |
| pBridge-PIF3-N7          | <i>PIF3-N7</i> | pBridge            | acagttgactgtatcgccggctatgcctctgtttgagctttcagg | ggaattagctggctgcaggtcagatctctgaccatagtc    |
| pBridge-PIF3-N8          | <i>PIF3-N8</i> | pBridge            | acagttgactgtatcgccggctatgcctctgtttgagctttcagg | ggaattagctggctgcaggtcaaggaatgttctctgatcta  |
| pBridge-PIF3-C1          | <i>PIF3-C1</i> | pBridge            | acagttgactgtatcgccggctatccctatgtcagtccatc     | ggaattagctggctgcaggtcacgacgatccacaaaactg   |
| pBridge-PIF3-C2          | <i>PIF3-C2</i> | pBridge            | acagttgactgtatcgccggctgatgactttgttccatggt     | ggaattagctggctgcaggtcacgacgatccacaaaactg   |
| pBridge-PIF3-C3          | <i>PIF3-C3</i> | pBridge            | acagttgactgtatcgccggctccctccctgatggatatt      | ggaattagctggctgcaggtcacgacgatccacaaaactg   |
| pBridge-PIF3-M1          | <i>PIF3-M1</i> | pBridge            | acagttgactgtatcgccggctatccctatgtcagtccatc     | ggaattagctggctgcaggttagggatgatgattcaacctg  |
| pBridge-PIF3-M2          | <i>PIF3-M2</i> | pBridge            | acagttgactgtatcgccggctgatgactttgttccatggt     | ggaattagctggctgcaggttagggatgatgattcaacctg  |
| pET42b-GST-PIF3          | <i>PIF3</i>    | pET42b             | ggcgaattctatgcctctgtttgagctttcag              | ccgctcgagcgacgatccacaaaactgatc             |
| pJHA212G-3HA-YFP-PIF3    | <i>PIF3pro</i> | pJHA212<br>G-RBCSt | catgattacgaattcgagctataaaccagaagatgcaac       | ggtgtgcttttacagaa                          |
|                          | <i>3HA-YFP</i> |                    | gtaaaacgcaacacatgtaccatacagatgttc             | gaaaagctcaaacagaggcataggggtgggagttggtg     |
|                          | <i>PIF3</i>    |                    | atgcctctgtttgagcttt                           | gcaggtcgactctagagtcacgacgatccacaaaac       |
| pJHA212G-3HA-YFP-PIF3mAD | <i>PIF3pro</i> | pJHA212<br>G-RBCSt | catgattacgaattcgagctataaaccagaagatgcaac       | ggtgtgcttttacagaa                          |
|                          | <i>3HA-YFP</i> |                    | gtaaaacgcaacacatgtaccatacagatgttc             | gaaaagctcaaacagaggcataggggtgggagttggtg     |
|                          | <i>PIF3</i>    |                    | atgcctctgtttgagcttt                           | gcaggtcgactctagagtcacgacgatccacaaaac       |
| pBridge-PIF3/PHYB        | <i>PIF3</i>    | pBridge            | acagttgactgtatcgccggctatgcctctgtttgagctttcagg | ggaattagctggctgcaggtcacgacgatccacaaaactg   |

|                     |                      |         |                                               |                                                               |
|---------------------|----------------------|---------|-----------------------------------------------|---------------------------------------------------------------|
| pBridge-PIF3/PHYB   | <i>PHYB-NLS</i>      | pBridge | catccatacaaatgggccatatggtttccggagtcggggg      | agatcttcgggctaatagcttacaccttctcttcttaggatatggc<br>atcatcagcat |
| pBridge-PIF3/PHYB-C | <i>PIF3</i>          | pBridge | acagttgactgtatcgccggctatgcctctgtttgagctttcagg | ggaattagctggctgcaggtcacgacgatccacaaaactg                      |
|                     | <i>PHYB-C-NLS</i>    |         | catccatacaaatgggccatatgaactctaaagttgtcgat     | agatcttcgggctaatagcttacaccttctcttcttaggatatggc<br>atcatcagcat |
| pBridge-PIF3/NGB    | <i>PIF3</i>          | pBridge | acagttgactgtatcgccggctatgcctctgtttgagctttcagg | ggaattagctggctgcaggtcacgacgatccacaaaactg                      |
|                     | <i>NGB</i>           |         | catccatacaaatgggccatatggtttccggagtcggggg      | aagatcttcgggctaatagcctatcctccaaccttctc                        |
| pBridge-PIF3/PHYA   | <i>PIF3</i>          | pBridge | acagttgactgtatcgccggctatgcctctgtttgagctttcagg | ggaattagctggctgcaggtcacgacgatccacaaaactg                      |
|                     | <i>PHYA-NLS</i>      |         | catccatacaaatgggccatatgtcaggctctaggccga       | agatcttcgggctaatagcctaaaccttctcttcttaggctgtttg<br>ctgcagcgag  |
| pBridge-PIF1/PHYB   | <i>PIF1</i>          | pBridge | acagttgactgtatcgccggctatgcatcattttgtccctg     | ggaattagctggctgcaggttaacctgttggtggttt                         |
|                     | <i>PHYB-NLS</i>      |         | catccatacaaatgggccatatggtttccggagtcggggg      | agatcttcgggctaatagcttacaccttctcttcttaggatatggc<br>atcatcagcat |
| pBridge-PIF1/NGB    | <i>PIF1</i>          | pBridge | acagttgactgtatcgccggctatgcatcattttgtccctg     | ggaattagctggctgcaggttaacctgttggtggttt                         |
|                     | <i>NGB</i>           |         | catccatacaaatgggccatatggtttccggagtcggggg      | aagatcttcgggctaatagcctatcctccaaccttctc                        |
| pBridge-PIF1/PHYA   | <i>PIF1</i>          | pBridge | acagttgactgtatcgccggctatgcatcattttgtccctg     | ggaattagctggctgcaggttaacctgttggtggttt                         |
|                     | <i>PIF1/PHYA-NLS</i> |         | catccatacaaatgggccatatgtcaggctctaggccga       | agatcttcgggctaatagcctaaaccttctcttcttaggctgtttg<br>ctgcagcgag  |
| pBridge-PIF1        | <i>PIF1</i>          | pBridge | acagttgactgtatcgccggctatgcatcattttgtccctg     | ggaattagctggctgcaggttaacctgttggtggttt                         |
| pBridge-PIF4        | <i>PIF4</i>          | pBridge | acagttgactgtatcgccggctatggaacaccaaggttg       | ggaattagctggctgcaggctagtggccaacagaga                          |
| pBridge-PIF5        | <i>PIF5</i>          | pBridge | gactgtatcgccggctatggaacaagtgttgctga           | ttagcttgctgcaggtcagcctattttaccat                              |
| pBridge-PIF7        | <i>PIF7</i>          | pBridge | gactgtatcgccggctatgcaattatggagtaa             | ttagcttgctgcaggctaatactctttctcatgat                           |
| pBridge-PIF8        | <i>PIF8</i>          | pBridge | gactgtatcgccggctatgtccaatgtgtccaaa            | ttagcttgctgcaggctatttggattcgaaggaggag                         |
| pBridge-PIL1        | <i>PIL1</i>          | pBridge | ttgactgtatcgccggctatggaagcaaaccttagc          | ttagcttgctgcaggtagttggcgagcgataat                             |
| pBridge-PIL2        | <i>PIL2</i>          | pBridge | gactgtatcgccggctatgatgttcttaccacccga          | ttagcttgctgcaggctatctgttagtttctctg                            |

**Supplementary Table 2. Primers used for generating the mutant constructs of PIFs and PHYB.**

| Plasmid name         | Gene name           | Vector  | Forward primer                | Reverse primer                                               |
|----------------------|---------------------|---------|-------------------------------|--------------------------------------------------------------|
| pBridge-PIF3-N1m1    | <i>PIF3-N1m1</i>    | pBridge | gagctggtgtgggaaaatggtc        | ccatttcccacaccagctcagcggctgcggcagcaggtggagaagggtcctgtc       |
| pBridge-PIF3-N1m2    | <i>PIF3-N1m2</i>    | pBridge | aatggtcagatatcaactcaaag       | tgagttgatatctgaccattagcggctgcggcagccacaactcatctacaggtgg      |
| pBridge-PIF3-N1m3    | <i>PIF3-N1m3</i>    | pBridge | actcaaagtcagtcagtagatc        | ctactgactgactttgtagtagcggctgcggcagctcccacaccagctccacaac      |
| pBridge-PIF3-N1m4    | <i>PIF3-N1m4</i>    | pBridge | agtagatcgaggaacattcctc        | ggaatgttctcgatctactagcggctgcggcagctgatatctgaccatttcccac      |
| pBridge-PIF3-N1m5    | <i>PIF3-N1m5</i>    | pBridge | attcctccaccacaagcaaac         | ttgcttgggtggaggaatagcggctgcggcagctgactgactttgagttgatatc      |
| pBridge-PIF3-N1m6    | <i>PIF3-N1m6</i>    | pBridge | gcaaactctctagagctagag         | ctagctctagaagagtttcagcggctgcggcagcgttctctgatctactgactg       |
| pBridge-PIF3-N1m7    | <i>PIF3-N1m7</i>    | pBridge | gctagagagattggaatggc          | ccatttcaatctctctagcagcggctgcggcagcttgggtggaggaatgttctc       |
| pBridge-PIF3-N1m8    | <i>PIF3-N1m8</i>    | pBridge | aatggctcaaagacgactatg         | atagtcgtcttgagccattagcggctgcggcagctctagaagagtttctgtgtgg      |
| pBridge-PIF3-N1m9    | <i>PIF3-N1m9</i>    | pBridge | actatggtggacgagatccc          | gggatctcgccaccatagtagcggctgcggcagctccaatctctctagctctagaag    |
| pBridge-PIF3-N1m10   | <i>PIF3-N1m10</i>   | pBridge | cttcagtggagactgatatgcc        | gatggcactgacatagggatagcggctgcggcagccgttcttgaccatttccaatc     |
| pBridge-PIF3-N1m11   | <i>PIF3-N1m11</i>   | pBridge | ccatcactaatgacgggttg          | caaaccctgattagtgatggagcggctgcggcagcctctgcccaccatagctctct     |
| pBridge-PIF3-N1m12   | <i>PIF3-N1m12</i>   | pBridge | ggtttgagcaagacgatgac          | tcctgctctgactcaaacaccagcggctgcggcagccactgacatagggatctctg     |
| pBridge-PIF3-N1m13   | <i>PIF3-N1m13</i>   | pBridge | gatgactttgtccatggtg           | aaccatggaacaaagtcacagcggctgcggcagccgtcattagtgatggcactgac     |
| pBridge-PIF3-N1m14   | <i>PIF3-N1m14</i>   | pBridge | tggtgaaatcatcatccctcc         | gagggatgatgattcaaccaagcggctgcggcagcgtcttgactcaaacctgctcattag |
| pBridge-PIF3-N1m15   | <i>PIF3-N1m15</i>   | pBridge | ccctcccttgatggatattgc         | caatccatcaagggaggagcggctgcggcagctggaacaaagtcacgtctgtg        |
| pBridge-PIF3-N1m16   | <i>PIF3-N1m16</i>   | pBridge | tattgctctgattcttgcg           | gcaagaaatcagagcaaatatgcagcagcggcggcatgatgattcaaccatgga       |
| pBridge-PIF3-N1m17   | <i>PIF3-N1m17</i>   | pBridge | ttgctgtagtgctgctc             | gacgacacatcacgcaaggcagcagcggcagctccatcaagggaggatg            |
| pBridge-PIF3-N1m18   | <i>PIF3-N1m18</i>   | pBridge | tcgtctcctgtactgtca            | gacagtaacaggagacgacgacgagcggcggaaatcagagcaatatccatc          |
| pBridge-PIF3-N1-D91A | <i>PIF3-N1-D91A</i> | pBridge | agtcaagacgctgactttgtccatggtga | aacaaagtcagcgtctgactcaaacctg                                 |

|                        |                      |         |                                                   |                                                |
|------------------------|----------------------|---------|---------------------------------------------------|------------------------------------------------|
| pBridge-PIF3-N1-D92A   | <i>PIF3-N1-D92A</i>  | pBridge | caagacgatgcctttgtccatggtgaat<br>c                 | tgaacaaaggcatcgtcttgactcaaacc                  |
| pBridge-PIF3-N1-F93A   | <i>PIF3-N1-F93A</i>  | pBridge | agacgatgacgctgtccatggtgaatc<br>at                 | ccatggaacagcgcatcgtcttgactcaa                  |
| pBridge-PIF3-N1-V94A   | <i>PIF3-N1-V94A</i>  | pBridge | gatgactttgctccatggtgaatcatcat                     | caaccatggagcaaagtcacgtcttgactc                 |
| pBridge-PIF3-N1-P95A   | <i>PIF3-N1-P95A</i>  | pBridge | tgactttgtgcatggtgaatcatcatc                       | attcaaccatgcaacaaagtcacgtcttg                  |
| pBridge-PIF3-N1-W96A   | <i>PIF3-N1-W96A</i>  | pBridge | caagacgatgactttgtccagcattgaa<br>tcatcatccctccctg  | caagggagggatgatgattcaatgctggaacaaagtcacgtcttg  |
| pBridge-PIF3-N1-L97A   | <i>PIF3-N1-L97A</i>  | pBridge | gacgatgactttgtccatgggcaaatca<br>tcatccctccctgatg  | catcaagggagggatgatgattgccatggaacaaagtcacgtc    |
| pBridge-PIF3-N1-N98A   | <i>PIF3-N1-N98A</i>  | pBridge | gatgactttgtccatggtggcacatcat<br>ccctccctgatgg     | ccatcaagggagggatgatgccaaccatggaacaaagtcac      |
| pBridge-PIF3-N1-H99A   | <i>PIF3-N1-H99A</i>  | pBridge | gactttgtccatggtgaatgcacatccct<br>cccttgatggatattg | caatatccatcaagggagggatgtgattcaaccatggaacaaagtc |
| pBridge-PIF3-N1-H100A  | <i>PIF3-N1-H100A</i> | pBridge | ctttgtccatggtgaatcatgcaccctcc<br>cttgatggatattg   | caatatccatcaagggagggatgattcaaccatggaacaaag     |
| pBridge-PIF3mAD        | <i>PIF3 mAD</i>      | pBridge | gctgctgcagcggcgaatcatcatccct<br>ccc               | cgccgctgcagcagcgtcatcgtcttgactcaa              |
| pBridge-PIF3/NGB-R110Q | <i>NGB-R110Q</i>     | pBridge | aatccagcaaggtggttacattcagcc                       | tgtaaccacctgctggattcgagagagat                  |
| pBridge-PIF3/NGB-G111D | <i>NGB-G111D</i>     | pBridge | tccagcgagatggttacattcagcctttc                     | gaggagccttaagagtagaaccaaccaag                  |
| pBridge-PIF3/NGB-R352K | <i>NGB-R352K</i>     | pBridge | tctactctaaggctcctcatggttgca                       | gaggagccttaagagtagaaccaaccaag                  |
| pBridge-PIF3mAD1       | <i>PIF3mAD1</i>      | pBridge | cggttccatctcgtaatcatcatccctccc<br>ttgatgga        | atgattacgagatggaacacggcatcgtcttgaca            |
| pBridge-PIF1mAD        | <i>PIF1mAD</i>       | pBridge | gatgaagctgcggcggctgcgcattatc<br>ctctccgt          | gataatgcgagccgccgagcttcatcttctgaata            |
| pBridge-PIF4mAD        | <i>PIF4mAD</i>       | pBridge | atcaagaagctgcggcggctgcgcaat<br>accctccagatgaag    | gtattgcgagccgccgagcttcttgatcttcaagaaag         |
| pBridge-PIF5mAD        | <i>PIF5mAD</i>       | pBridge | caagaagctgcggcggctgcgcaatac<br>cctccgatgacgtc     | agggattgcgagccgccgagcttcttgatcatctag           |

|                 |                |         |                                              |                                      |
|-----------------|----------------|---------|----------------------------------------------|--------------------------------------|
| pBridge-PIF7mAD | <i>PIF7mAD</i> | pBridge | cacctcggctgcggcggctgcgactca<br>aagtctcaacggt | gacttgagtcgcagccgccgcagccgaggtggtggt |
| pBridge-PIF8mAD | <i>PIF8mAD</i> | pBridge | aggctcggcggctgcgcatcatcgctc<br>ctcca         | atgcgcagccgccgcagcctcatccgtgg        |

---



**Supplementary Table 3. Primers for qRT-PCR analyses.**

| <b>Accession</b> | <b>Gene name</b> | <b>Forward primer</b>     | <b>Reverse primer</b>    |
|------------------|------------------|---------------------------|--------------------------|
| AT1G69960        | <i>PP2A</i>      | TATCGGATGACGATTCTTCGTGCAG | GCTTGGTCGACTATCGAATGAGAG |
| AT2G46970        | <i>PIL1</i>      | AAATTGCTCTCAGCCATTCGTGG   | TTCTAAGTTTGAGGCGGACGCAG  |
| AT4G16780        | <i>ATHB2</i>     | TCACAGTACTCTCAATCCGAAGC   | CCGTAAGAACTCGCAGTCTAC    |
| AT4G14130        | <i>XTR7</i>      | CACCGTCACTGCTTACTACTTG    | CATTGGTGTGAAGAACATAAG    |
| AT4G32280        | <i>IAA29</i>     | CACCATCATTGCCCGTATCA      | CCACAGTAGCCGTTGTTGGA     |
| AT2G33380        | <i>RD20</i>      | AAGGACGAAGATGGTTTCCTATC   | CGAGAATTGGCCCTCTCTTT     |
| AT4G14690        | <i>ELIP2</i>     | GGCAGAGGCAAAGTCAAAAGG     | CGCAACGAGACCGAGCAT       |

**Supplementary Table 4. Primer sets for ChIP-qPCR analysis of the *PIL1* locus.**

| <b>Primer set</b> | <b>Forward primer</b>    | <b>Reverse primer</b>     |
|-------------------|--------------------------|---------------------------|
| 1                 | ATGAATCACGCGGCATTC       | ACGTGAGCGGAAAGAACC        |
| 2                 | GGATGAACAATGCACCACCAC    | ACACGAAGGCACCACGAATG      |
| 3                 | CTCTATGACAGGAACATCACACC  | ACAATGACTTGCCTTGTTTACAG   |
| 4                 | TCGAAGCAAAACCAATCCAAAC   | GAATTGTGACCATTCTTTGTTTCAG |
| 5                 | AGTTGCATTATTGTTGGAGCATC  | AAGGTCAGGAAAACACAATGTAG   |
| 6                 | CTGTGTCATAATCACGATTCAAGG | TTGGGGTTAATGAAGAGCAGC     |
